# Supplementary material for: Effects of goethite on the fractions of Cu, Cd, Pb, P and soil enzyme activity with hydroxyapatite in heavy metal-contaminated soil
Source: Royal Society of Chemistry journal article supplement (doi:10.1039/c7ra08786a), 2017-01-01
Supplement: c7ra08786a1.pdf [file c7ra08786a1.pdf]

**Effects of goethite on the fractions of Cu, Cd, Pb, P and soil enzyme activity with  
hydroxyapatite in a heavy metal-contaminated soil**

Hongbiao Cui<sup>1,2\*</sup>, Xiong Yang<sup>1</sup>, Lei Xu<sup>2,3</sup>, Yuchao Fan<sup>1</sup>, Qitao Yi<sup>1\*</sup>, Ruyan Li<sup>1</sup>, Jing Zhou<sup>2\*</sup>

1. School of Earth and Environment, Anhui University of Science and Technology, Huainan 232001, China
2. Key Laboratory of Soil Environment and Pollution Remediation, Institute of Soil Science, Chinese Academy Sciences, Nanjing 210008, China
3. College of Environmental Science and Tourism, NanYang Normal University, NanYang 473000, China

*\*Corresponding author.* Tel: +86 15215546045; +86 25 86881632

E-mail address: yiqitao@163.com (Q. Yi); zhoujing@issas.ac.cn (J. Zhou).

|                                                                                                                    |
|--------------------------------------------------------------------------------------------------------------------|
| <b>Table of contents</b>                                                                                           |
| Test S1. Simplified bioaccessibility extraction test (SBET) procedure                                              |
| Test S2. Soil Cu, Cd and Pb sequential extraction procedure                                                        |
| Test S3. Soil P sequential extraction procedure                                                                    |
| Fig. S1. The TEM imaging of hydroxyapatite (HAP)                                                                   |
| Fig. S2. Powder X-ray diffraction patterns of hydroxyapatite                                                       |
| Fig. S3. The TEM imaging of goethite                                                                               |
| Fig. S4. Powder X-ray diffraction patterns of goethite.                                                            |
| Fig. S5. Effects of HAP and goethite applications on percentage of Cu (A), Cd (B), and Pb (C).                     |
| Fig. S6. Effects of HAP and goethite applications on the concentrations of bioaccessible Cu, Cd, and Pb.           |
| Table S1. Correlation coefficients between various extractable heavy metal concentrations and microbial activities |

**Text S1. Simplified bioaccessibility extraction test (SBET) procedure**

Briefly, a gastric solution was prepared by dissolving 1.25 g of pepsin, 0.5 g sodium citrate, 0.5 g sodium malate, 500  $\mu\text{L}$  acetic acid and 420  $\mu\text{L}$  lactic acid in 1 L Milli-Q water with the pH adjusted to 2.5 using 12 mol  $\text{L}^{-1}$  HCl. About 0.4 g of soil sample was extracted using 40 mL of the gastric solution (solid:fluid = 1:100) in a 100 mL polypropylene centrifuge tube with shaking (37 °C) for 1 h. The pH of the extraction solution was measured every 30 min using a pH meter and, if needed, adjusted using 12 mol  $\text{L}^{-1}$  HCl or saturated  $\text{NaHCO}_3$  solution to maintain a constant pH (1.5). After 1 h, the extractants were centrifuged (2810 $\times$ g for 10 min), and 20 mL supernatant was directly taken from each tube and filtered through 0.45  $\mu\text{m}$  filters (Whatman 1) as a stomach phase. They were stored at 4°C and analyzed within 48 h.

## **Text S2. Soil Cu, Cd and Pb sequential extraction procedure**

A sequential extraction procedure modified from the method of Tessier et al. (1979) was described as follows:

(1). Exchangeable fraction: 16 mL magnesium chloride ( $1 \text{ mol L}^{-1} \text{ MgCl}_2$ , pH=7) was added in a 100-mL polypropylene centrifuge tube containing  $2 \pm 0.0001 \text{ g}$  of soil sieved through a 0.15-mm mesh. The tube was shaken for 2 h at  $25 \pm 1 \text{ }^\circ\text{C}$  on an end-over mechanical shaker operating at 120 rpm. After equilibration, the suspension was centrifuged at 4,000 rpm for 10 min. The supernatant was decanted and filtered through a 0.45- $\mu\text{m}$  filter and transferred into a polyethylene container and stored at  $4 \text{ }^\circ\text{C}$  until analysis.

(2). Bound to carbonates: The residue from (1) was shaken with 16 mL  $\text{mol L}^{-1}$  sodium acetate ( $\text{CH}_3\text{COONa}$ ), with pH adjusted to 5.0 with acetic acid ( $\text{CH}_3\text{COOH}$ ). The tube was shaken for 3 h at  $25 \pm 1 \text{ }^\circ\text{C}$ , and the extraction procedure was the same as in (1).

(3). Bound to Fe–Mn oxides: The residue from (2) was shaken with 40 mL hydroxylamine hydrochloride ( $0.04 \text{ mol L}^{-1}$ ,  $\text{NH}_2\text{OH}\cdot\text{HCl}$ ) in 25 % (v/v)  $\text{CH}_3\text{COOH}$ . The tube was heated to  $96 \pm 3 \text{ }^\circ\text{C}$  in a water bath for 6 h, and the extraction procedure was the same as in (1).

(4). Bound to organic matter fraction: 6 mL nitric acid ( $0.02 \text{ mol L}^{-1}$ ,  $\text{HNO}_3$ ) and 10 mL hydrogen peroxide (30 %  $\text{H}_2\text{O}_2$ , acidified to pH 2 with  $\text{HNO}_3$ ) were added into the residue from (3), and the mixture was heated to  $85 \pm 2 \text{ }^\circ\text{C}$  for 2 h in a water bath. Then, 6 mL  $\text{H}_2\text{O}_2$  (30 %, acidified to pH 2 with  $\text{HNO}_3$ ) was added, and the sample was heated again to  $85 \pm 2 \text{ }^\circ\text{C}$  for 3 h. After cooling, 10 mL ammonium acetate ( $3.2 \text{ mol L}^{-1}$ ,  $\text{CH}_3\text{COONH}_4$ ) in 20 % (v/v)  $\text{HNO}_3$  was added at  $25 \pm 1 \text{ }^\circ\text{C}$  for 30 min. The extraction procedure was the same as in (1).

(5). Residual fraction: The difference between the total and non-residual fractions was regarded as the residual fraction. Each fraction of the certified reference material was analyzed in triplicate. The residual fraction of the certified reference material was analyzed by digestion with  $\text{HNO}_3$ –HF– $\text{HClO}_4$  (5:10:5 mL). The sum of concentrations of Cu and Cd in different fractions was compared with the concentrations obtained by total digestion. The accuracy ranged between 83 % and 116 %. Therefore, the difference between the total and non-residual fractions was called the residual fraction.

### **Text S3. Soil P sequential extraction procedure**

A sequential extraction method for phosphorus fractions modified from the method of Tiessen and Moir (1993): (1) labile resin-P, 0.5 g air-dried soil was extracted with deionized water and one anion-exchange resin strip; (2) labile inorganic  $\text{NaHCO}_3\text{-P}$  ( $\text{NaHCO}_3\text{-Pi}$ ) and organic  $\text{NaHCO}_3\text{-P}$  ( $\text{NaHCO}_3\text{-Po}$ ) were extracted with  $0.5 \text{ mol L}^{-1} \text{ NaHCO}_3$  at  $\text{pH} = 8.5$ ; (3) moderately labile inorganic  $\text{NaOH-P}$  ( $\text{NaOH-Pi}$ ) and organic  $\text{NaOH-P}$  ( $\text{NaOH-Po}$ ) were extracted with  $\text{NaOH}$  ( $0.1 \text{ mol L}^{-1}$ ); (4) stable  $\text{HCl-P}$  was extracted with  $\text{HCl}$  ( $1 \text{ mol L}^{-1}$ ); (5) stable residual P was measured after the remaining soil digested with  $\text{H}_2\text{SO}_4/\text{H}_2\text{O}_2$ .

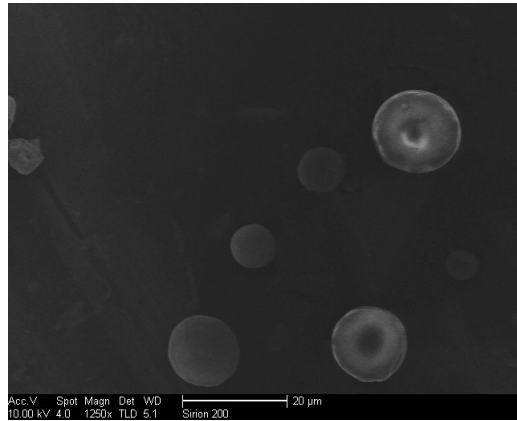

**Fig. S1.** The TEM imaging of hydroxyapatite (HAP)

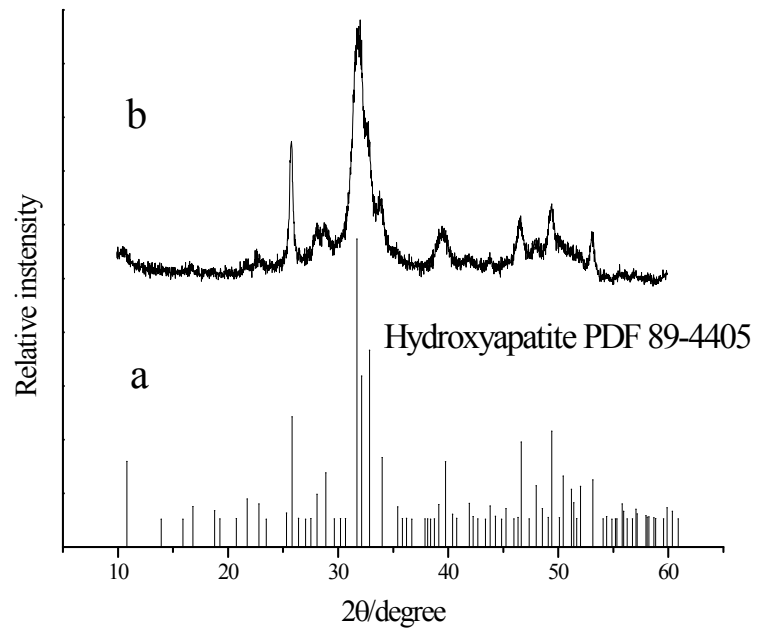

**Fig. S2.** Powder X-ray diffraction patterns of hydroxyapatite.

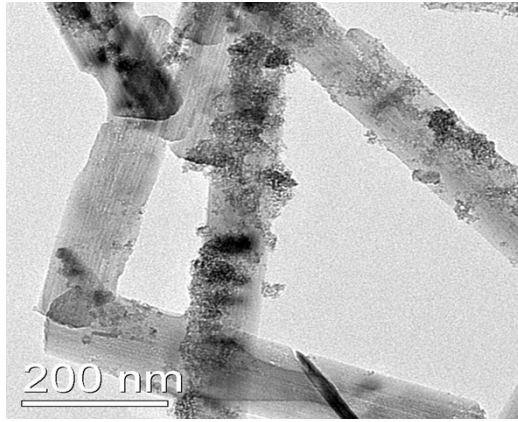

**Fig. S3.** The TEM imaging of goethite



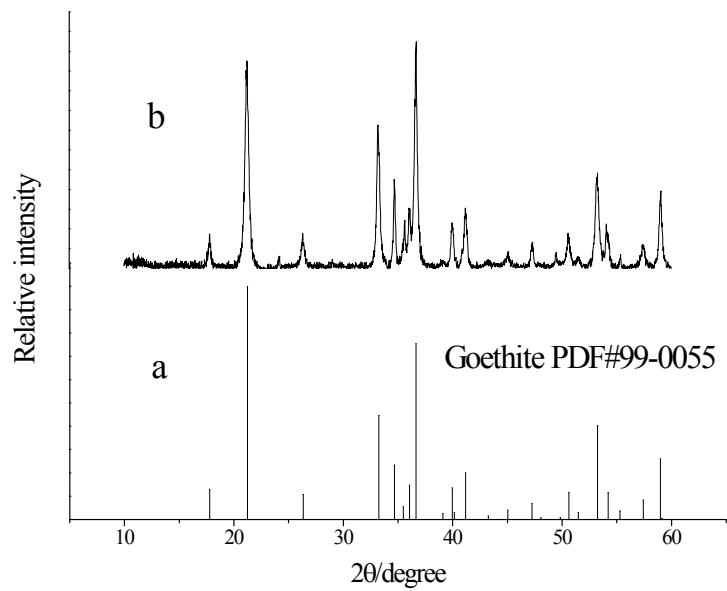

**Fig. S4.** Powder X-ray diffraction patterns of goethite.

**Fig. S5.** Effects of HAP and goethite applications on percentage of Cu (A), Cd (B), and Pb (C). CK=untreated soil, LG=0.5% goethite plus soil, HG=1% goethite plus soil, HAP=1% HAP plus soil, LGH=0.5% goethite and 1% HAP plus soil, HGH=1% goethite and 1% HAP plus soil. Means (n = 3) followed by different letters above the columns indicated significant difference at the  $P < 0.05$ . Error bars are standard error of the mean.

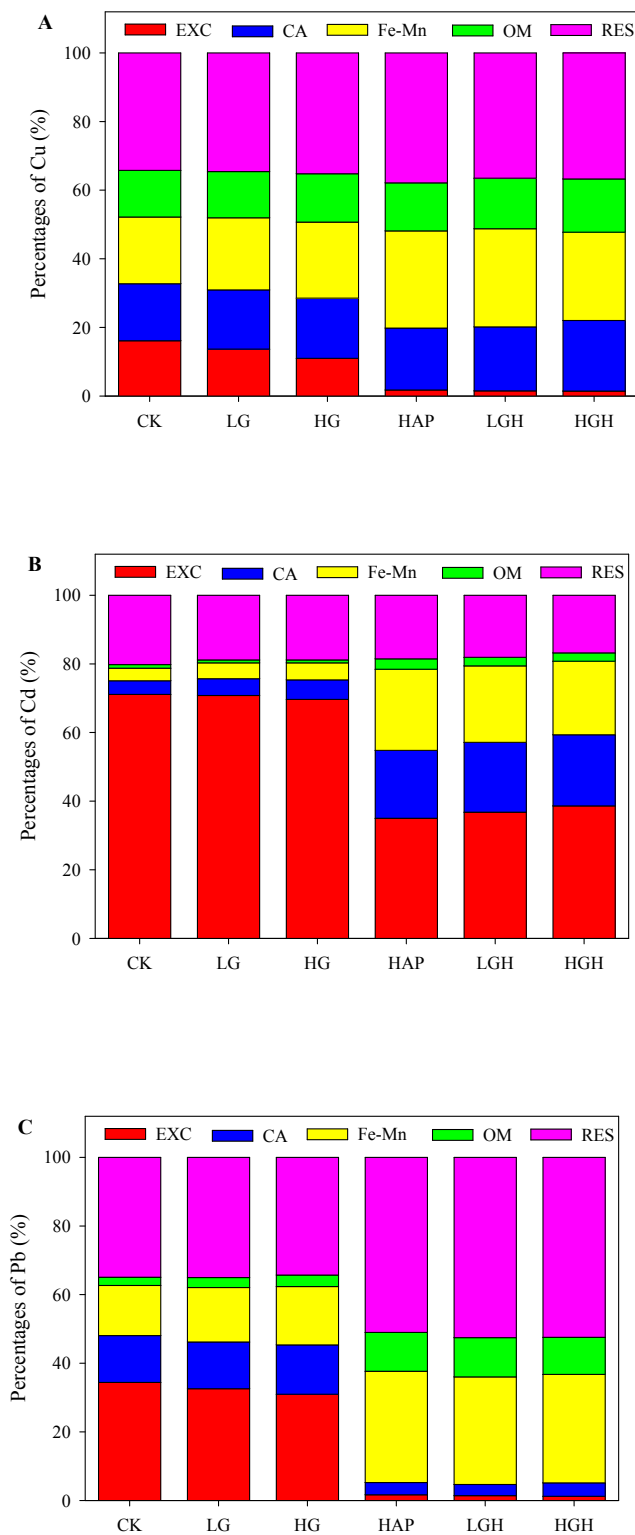

**Fig. S6.** Effects of HAP and goethite applications on the concentrations of bioaccessible Cu, Cd, and Pb. CK=untreated soil, LG=0.5% goethite plus soil, HG=1% goethite plus soil, HAP=1% HAP plus soil, LGH=0.5% goethite and 1% HAP plus soil, HGH=1% goethite and 1% HAP plus soil. Means (n = 3) followed by different letters above the columns indicated significant difference at the  $P < 0.05$  Error bars are standard error of the mean.

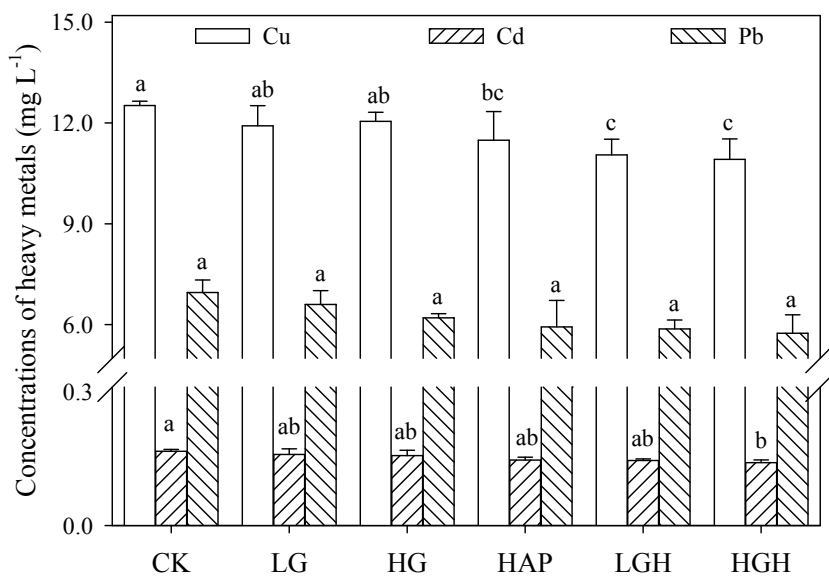

**Table S1.** Correlation coefficients between various extractable heavy metal concentrations and microbial activities (n=5).

|                        | pH       | Catalase | Urease   | Phosphatase | Ca-Cu    | Ca-Cd    | Ca-Pb    | EXC-Cu   | EXC-Cd   | EXC-Pb   | Resin-P | NaHCO <sub>3</sub> -Pi |
|------------------------|----------|----------|----------|-------------|----------|----------|----------|----------|----------|----------|---------|------------------------|
| pH                     | 1        |          |          |             |          |          |          |          |          |          |         |                        |
| Catalase               | 0.965**  | 1        |          |             |          |          |          |          |          |          |         |                        |
| Urease                 | 0.966**  | 0.947**  | 1        |             |          |          |          |          |          |          |         |                        |
| Phosphatase            | 0.997**  | 0.973**  | 0.969**  | 1           |          |          |          |          |          |          |         |                        |
| Ca-Cu                  | -0.981** | -0.946** | -0.948** | -0.978**    | 1        |          |          |          |          |          |         |                        |
| Ca-Cd                  | -0.969** | -0.969** | -0.954** | -0.973**    | 0.968**  | 1        |          |          |          |          |         |                        |
| Ca-Pb                  | -0.990** | -0.940** | -0.952** | -0.984**    | 0.993**  | 0.954**  | 1        |          |          |          |         |                        |
| EXC-Cu                 | -0.995** | -0.966** | -0.965** | -0.993**    | 0.989**  | 0.984**  | 0.990**  | 1        |          |          |         |                        |
| EXC-Cd                 | -0.971** | -0.963** | -0.978** | -0.946**    | 0.951**  | 0.994**  | 0.937**  | 0.974**  | 1        |          |         |                        |
| EXC-Pb                 | -0.974** | -0.971** | -0.957** | -0.978**    | 0.969**  | 0.999**  | 0.958**  | 0.987**  | 0.996**  | 1        |         |                        |
| Resin-P                | 0.905**  | 0.880**  | 0.911**  | 0.904**     | -0.909** | -0.964** | -0.891** | -0.930** | -0.953** | -0.963** | 1       |                        |
| NaHCO <sub>3</sub> -Pi | 0.643*   | 0.634*   | 0.650*   | 0.648*      | -0.654*  | -0.760** | -0.618*  | -0.678*  | -0.761** | -0.760** | 0.876** | 1                      |

Ca-Cu, CaCl<sub>2</sub>-extractable Cu; Ca-Cd, CaCl<sub>2</sub>-extractable Cd; Ca-Pb, CaCl<sub>2</sub>-extractable Pb; EXC-Cu, exchangeable fraction of Cu; EXC-Cd, exchangeable fraction of Cd; EXC-Pb, exchangeable fraction of Pb;

\* Significant at  $P < 0.05$ .

\*\* Significant at  $P < 0.01$ .
